# Supplementary material for: Controllable growth of MnOx dual-nanocrystals on N-doped graphene as lithium-ion battery anode
Source: Royal Society of Chemistry journal article supplement (doi:10.1039/c6ra27297e), 2017-01-01
Supplement: c6ra27297e1.pdf [file c6ra27297e1.pdf]

## Supporting Information

### Controllable Growth of MnO<sub>x</sub> Dual-Nanocrystals on N-doped Graphene as Lithium-ion Batteries' Anode

Zhongtao Li, Yuankun Wang, Yan Chen and Mingbo Wu\*

*a. State Key Laboratory of Heavy Oil Processing, School of Chemical Engineering, China University of Petroleum, Qingdao 266580, People's Republic of China*

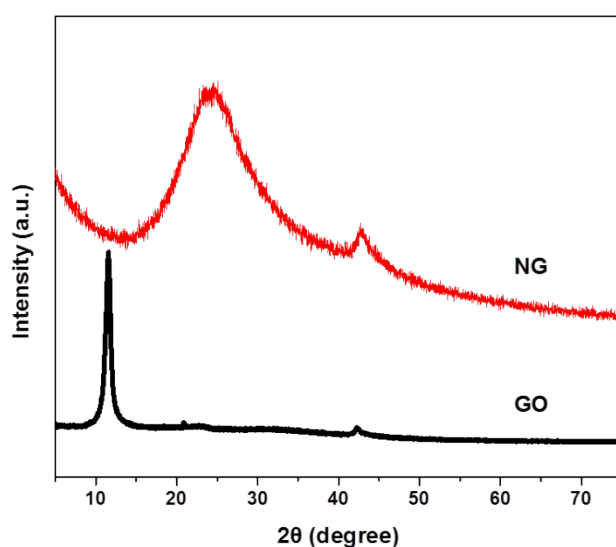

Fig. S1 XRD patterns of GO and NG.

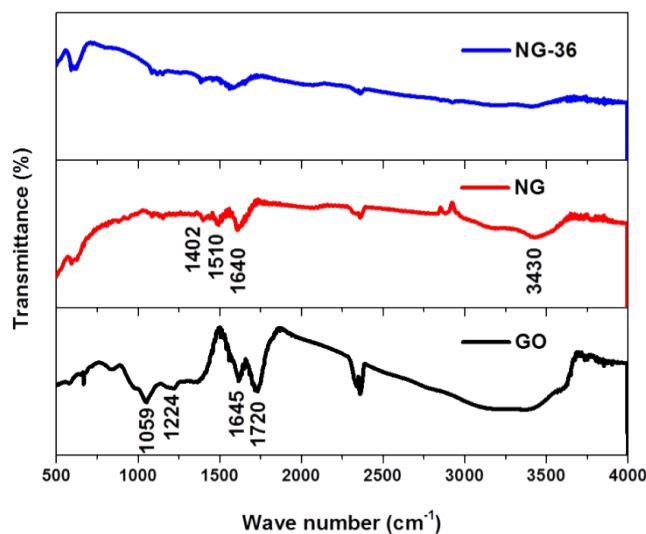

Fig. S2 FT-IR spectra of GO, NG and NG-36.

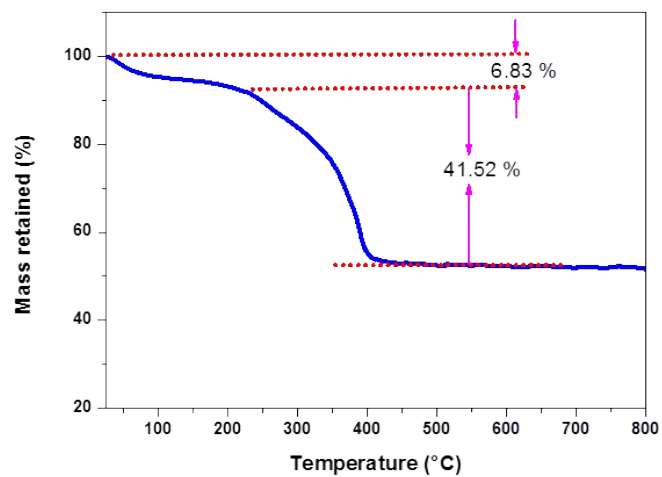

Figure S3 TGA curve of NG-36.

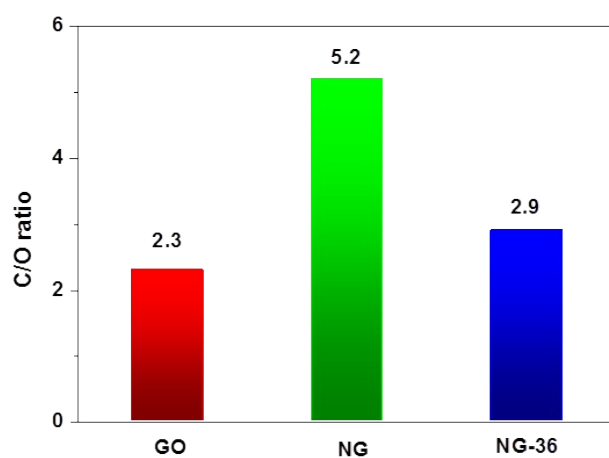

Fig. S4 Relationship of the C/O ratio in the GO, NG, and NG-36.

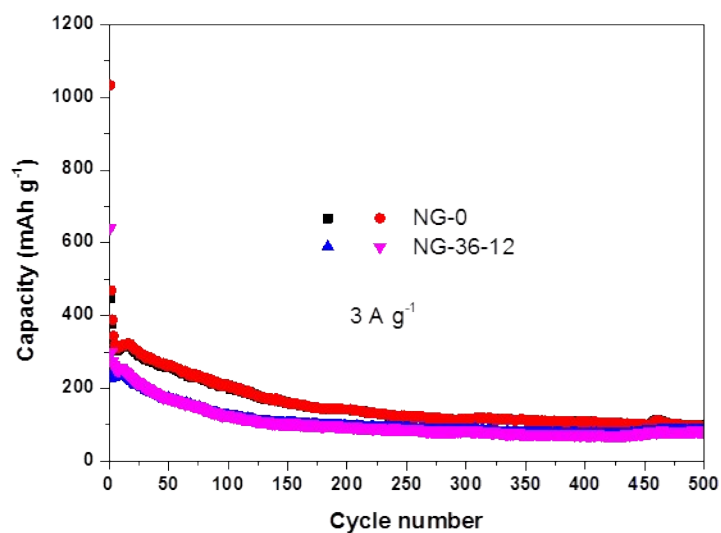

Fig. S5 Long-term cycling performance of the NG-0 and NG-36-12 electrode at 3 A g<sup>-1</sup> for 500 cycles.

Table S1. Summary of the elemental contents in GO, NG, and NG-36

| <b>Name</b> | <b>GO (at%)</b> | <b>NG (at%)</b> | <b>NG-36 (at%)</b> |
|-------------|-----------------|-----------------|--------------------|
| <b>C</b>    | <b>69.5</b>     | <b>78.2</b>     | <b>65.7</b>        |
| <b>O</b>    | <b>30.5</b>     | <b>15.0</b>     | <b>23.0</b>        |
| <b>N</b>    | <b>--</b>       | <b>6.8</b>      | <b>6.1</b>         |
| <b>Mn</b>   | <b>--</b>       | <b>--</b>       | <b>5.2</b>         |
